# Supplementary material
Source: publisher figshare collection journal article supplement (https://gsajournals.figshare.com/articles/dataset/_/12567827)
Supplement: Supplementary file 2 [file 1]

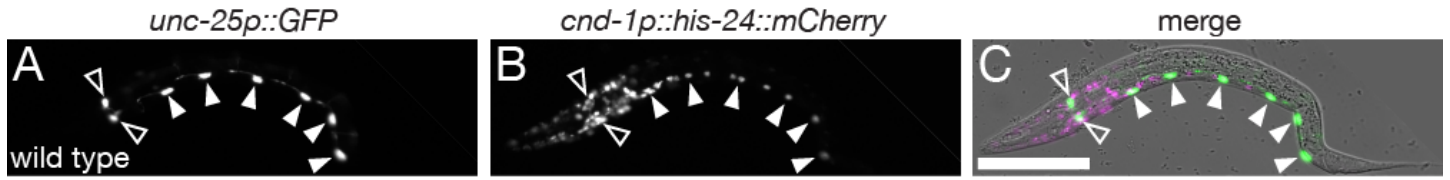

**Figure S4.** *unc-25p::GFP* colocalizes with *cnd-1p::his-24::mCherry* in L1 larval DD and RME neurons. (A) *unc-25p::GFP* expression. (B) *cnd-1p::his-24::mCherry* expression. (C) DIC image plus merge of panels A and B. Scale bar = 50 $\mu$ m. Open arrowheads show RME neurons (two out of four are visible). Filled arrowheads show DD neurons 1-6 (DD1 anterior/left, DD6 posterior/right).
