# Supplementary material
Source: publisher figshare collection journal article supplement (https://gsajournals.figshare.com/articles/dataset/_/12567827)
Supplement: Supplementary file 3 [file 1]

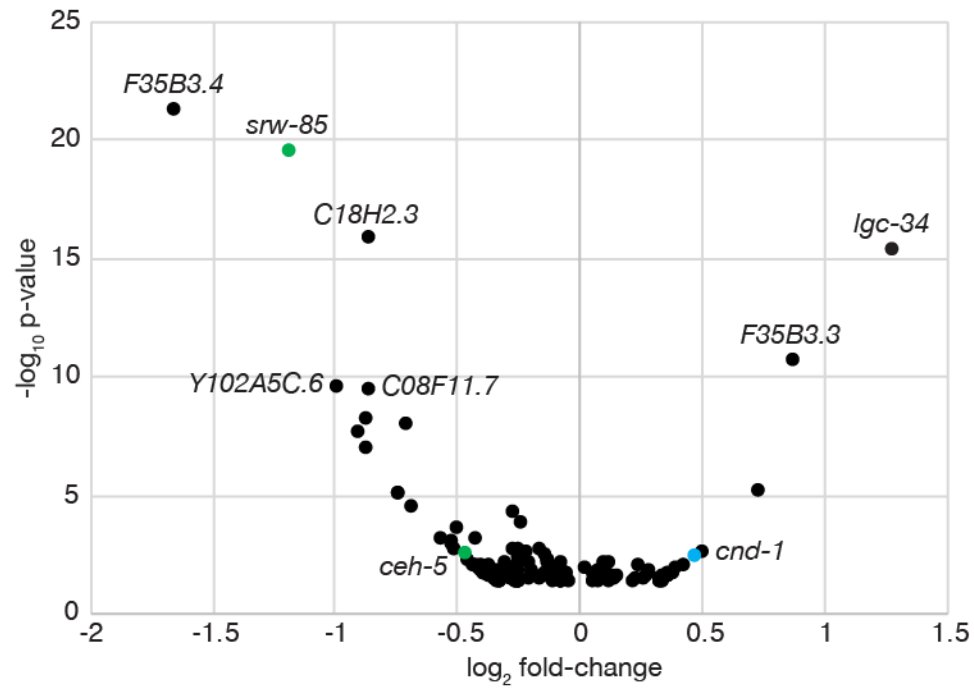

**Figure S1.** Volcano plot of *cnd-1(ju29)* comparative transcriptome data. The homeobox transcription factor *ceh-5/Vax2* and *cnd-1/Neurod1* were the primary foci of this study. Additional genes are annotated for information.
