# Supplementary material
Source: publisher figshare collection journal article supplement (https://gsajournals.figshare.com/articles/dataset/_/12567827)
Supplement: Supplementary file 4 [file 1]

### A CND-1 wild type

MRPTDTSNFAPAEISKRKVRRVKANGRERARMHGLNNALDMLREYIPITTQHOKLSKIET  
LRLARNYIDALQRMLO<sup>TN</sup>EQPTPLEYAHTLANGLSQTTTNMLANLLQ**VQPRQLLPSSQFD**  
**IFSDPSHHQLHP SHPPHSSSFSSSSPSSSCSP PQYYYSPTQPSAAPLQGSCDPQYQQMYH**  
QHS HQNTFNYS P\*

### B CND-1 (*ju29* mutant)

MRPTDTSNFAPAEISKRKVRRVKANGRERARMHGLNNALDMLREYIPITTQHOKLSKIET  
LRLARNYIDALQRMLO<sup>TN</sup>EQPTPLEYAHTLANGLSQTTTNMLANLLQ**SNLVNSFH HHNST**  
**SSLIHPIINF IHLIHHHIHP SHHHHHHLHVLHLNIIILQLNHQLLHF KDHVIHNINKCII**  
**NIPIRILLIIH HKFRFFFKYLLRVSF FDF\***

**Figure S3.** Comparison of predicted CND-1 wild type and *ju29* mutant protein sequences. (A) CND-1 protein sequence. Region highlighted in grey shows the basic-helix-loop-helix dimerization and DNA binding domain. The region in orange shows the extended NeuroD-specific superfamily domain. The region in bold font is weakly homologous to a non-DNA binding domain in GATA-class transcription factors. (B) CND-1(*ju29*) mutant protein. The frame-shifted sequence beyond the *ju29* allele plus additional 16 amino acids is highlighted in magenta.
